# Supplementary material for: Life-cycle analysis of microalgae-based polyurethane foams
Source: Royal Society of Chemistry journal article supplement (doi:10.1039/d5su00708a), 2025-12-08
Supplement: d5su00708a1.pdf [file d5su00708a1.pdf]

## Supporting Information

### Life-Cycle Analysis of Microalgae-based Polyurethane Foams

Ulises R. Gracida-Alvarez,<sup>1</sup> Matthew Wiatrowski,<sup>2</sup> Pahola Thathiana Benavides,<sup>1\*</sup> Jingyi Zhang,<sup>1</sup> Ryan Davis,<sup>2</sup> Troy R. Hawkins<sup>1</sup>

<sup>1</sup>Systems Assessment Center, Energy Systems and Infrastructure Analysis Division, Argonne National Laboratory, 9700 South Cass Avenue, Lemont, IL, 60439 USA

<sup>2</sup>Catalytic Carbon Transformation and Scale-up Center, National Renewable Energy Laboratory, 15013 Denver West Parkway, Golden, CO, 80401 USA

\*Corresponding author email: [pbenavides@anl.gov](mailto:pbenavides@anl.gov)

Number of pages: 31

Number of Figures: 9

Number of Tables: 28

## S1 Life cycle assessment (LCA) data

### S1.1 GHG emissions of conventional counterparts for the biorefinery products

Table S1 presents the values of the GHG emissions, fossil energy, and water consumption used in the estimation of the impacts of conventional counterpart pathways in this study.

Table S1. Environmental impacts of conventional counterparts.<sup>1</sup>

| Coproduct         | GHG emissions                 | Fossil energy | Water consumption |
|-------------------|-------------------------------|---------------|-------------------|
| Flexible PU       | 3.43 kg CO <sub>2</sub> e/kg  | 72.4 MJ/kg    | 4.97 L/kg         |
| Rigid PU          | 3.21 kg CO <sub>2</sub> e/kg  | 69.2 MJ/kg    | 4.79 L/kg         |
| Petroleum diesel  | 91.4 g CO <sub>2</sub> e/MJ   | 1.18 MJ/MJ    | 0.083 L/MJ        |
| Petroleum naphtha | 92.9 g CO <sub>2</sub> e/MJ   | 1.15 MJ/MJ    | 0.076 L/MJ        |
| Electricity       | 0.47 kg CO <sub>2</sub> e/kWh | 5.91 MJ/kWh   | 2.23 L/kWh        |

### S1.2 Life cycle inventory data of the biorefinery

This section presents the material and energy requirements obtained from the Aspen Plus modeling of the microalgae biorefinery. This information was obtained from previous reports<sup>2-5</sup> and is presented on a per hour and a per kg of product basis. The information on a per kg of PU foam was utilized for evaluation of the environmental impacts of Bio-PU and Bio-NIPU.

Table S2. Material and energy requirements for the cultivation of one kg of microalgae ash-free dry weight (AFDW).<sup>2,3</sup>

|                                  | Per hour of operation | Per kg microalgae AFDW |
|----------------------------------|-----------------------|------------------------|
| <b>Process inputs</b>            |                       |                        |
| Carbon dioxide (kg)              | 34,112                | 2.22                   |
| Ammonia (kg)                     | 309                   | 0.02                   |
| Diammonium phosphate (kg)        | 149                   | 0.01                   |
| Process water input (Saline, kg) | 511,527               | 33.29                  |
| Electricity (MJ)                 | 32,569                | 2.12                   |
| <b>Product</b>                   |                       |                        |
| Microalgae biomass AFDW (kg)     | 15,364                | 1                      |

Table S3. Material and energy requirements of the microalgae biorefinery to produce Bio-PU.<sup>2,4</sup>

| Basis                        | per hour of operation             |                                   | per kg Bio-PU                     |                                   |
|------------------------------|-----------------------------------|-----------------------------------|-----------------------------------|-----------------------------------|
| Route                        | Carboxylic acid (CA) intermediate | 2,3-butanediol (BDO) intermediate | Carboxylic acid (CA) intermediate | 2,3-butanediol (BDO) intermediate |
| <b>Process inputs</b>        |                                   |                                   |                                   |                                   |
| <b>Feedstock</b>             |                                   |                                   |                                   |                                   |
| Microalgae Biomass AFDW (kg) | 15,987                            | 15,987                            | 4.45                              | 4.45                              |
| <b>Pretreatment</b>          |                                   |                                   |                                   |                                   |
| Sulfuric acid (93%) (kg)     | 1,420                             | 1,420                             | 0.40                              | 0.40                              |
| Ammonia (kg)                 | 459                               | 459                               | 0.13                              | 0.13                              |

|                                               |        |        |                      |                      |
|-----------------------------------------------|--------|--------|----------------------|----------------------|
| <b>Lipid extraction and clean-up</b>          |        |        |                      |                      |
| Hexane (kg)                                   | 84     | 84     | 0.02                 | 0.02                 |
| Ethanol (kg)                                  | 34     | 34     | 0.01                 | 0.01                 |
| Phosphoric acid (kg)                          | 46     | 46     | 0.01                 | 0.01                 |
| Silica (kg)                                   | 5      | 5      | 0.00                 | 0.00                 |
| Clay (kg)                                     | 9      | 9      | 0.00                 | 0.00                 |
| <b>Carboxylic Acid Conversion</b>             |        |        |                      |                      |
| Corn steep liquor (kg)                        | 721    | N.A.   | 0.20                 | N.A.                 |
| Diammonium phosphate (kg)                     | 75     | N.A.   | 0.02                 | N.A.                 |
| Hydrotalcite (kg)*                            | 1      | N.A.   | $2.8 \times 10^{-4}$ | N.A.                 |
| Flocculant (kg)                               | 64     | N.A.   | 0.02                 | N.A.                 |
| Hexane (kg)                                   | 1      | N.A.   | 0.00                 | N.A.                 |
| <b>2,3-BDO Conversion</b>                     |        |        |                      |                      |
| Corn steep liquor (kg)                        | N.A.   | 107    | N.A.                 | 0.03                 |
| Diammonium phosphate (DAP, kg)                | N.A.   | 13     | N.A.                 | 0.00                 |
| Hydrogen (kg)                                 | N.A.   | 89     | N.A.                 | 0.02                 |
| Flocculant (kg)                               | N.A.   | 64     | N.A.                 | 0.02                 |
| Dehydration catalyst (kg)*                    | N.A.   | 0.07   | N.A.                 | $1.9 \times 10^{-5}$ |
| Oligomerization catalyst (kg)*                | N.A.   | 0.13   | N.A.                 | $3.6 \times 10^{-5}$ |
| <b>Final Fuel Upgrading (HDO/HI)</b>          |        |        |                      |                      |
| Hydrogen (kg)                                 | 107    | 97     | 0.03                 | 0.03                 |
| One step HDO/HI catalyst (1% Pt/SAPO-11, kg)* | 0.23   | 0.25   | $6.4 \times 10^{-5}$ | $7.0 \times 10^{-5}$ |
| <b>Polyurethane Production</b>                |        |        |                      |                      |
| Formic acid (kg)                              | 347    | 347    | 0.10                 | 0.10                 |
| Hydrogen peroxide (kg)                        | 549    | 549    | 0.15                 | 0.15                 |
| Nitrogen (kg)                                 | 52     | 52     | 0.01                 | 0.01                 |
| Toluene diisocyanate (kg)                     | 953    | 953    | 0.27                 | 0.27                 |
| Diethanolamine (kg)                           | 9      | 9      | 0.00                 | 0.00                 |
| Surfactant (kg)                               | 17     | 17     | 0.00                 | 0.00                 |
| Tin catalyst (stannous octoate, kg)*          | 6      | 6      | $1.7 \times 10^{-3}$ | $1.7 \times 10^{-3}$ |
| DABCO (1,4-diazabicyclo[2.2.2]octane, kg)*    | 3      | 3      | $8.3 \times 10^{-4}$ | $8.3 \times 10^{-4}$ |
| <b>Other Resource Consumption</b>             |        |        |                      |                      |
| Supplemental natural gas (Combined, MJ)       | 44,502 | 60,342 | 12.39                | 16.79                |
| Supplemental natural gas (fuel-only, MJ)      | 5,657  | 35,639 | 1.57                 | 9.92                 |
| Supplemental natural gas (PU-only, MJ)        | 43,088 | 57,042 | 11.99                | 15.88                |
| Process water (Combined, L)                   | 47,913 | 54,538 | 13.34                | 15.18                |
| Process water (fuel-only, L)                  | 100    | 31,910 | 0.03                 | 8.88                 |
| Process water (PU-only, L)                    | 17,827 | 17,819 | 4.96                 | 4.96                 |
| <b>Process outputs</b>                        |        |        |                      |                      |
| <b>CO2 Recycle</b>                            |        |        |                      |                      |
| CO2 (biogenic, kg)                            | 9,090  | 8,981  | 2.53                 | 2.50                 |
| CO2 (fossil, kg)                              | 5,986  | 9,467  | 1.67                 | 2.63                 |
| <b>Products</b>                               |        |        |                      |                      |
| Diesel (MJ)                                   | 97,309 | 88,964 | 27.08                | 24.76                |
| Naphtha (MJ)                                  | 40,265 | 51,410 | 11.21                | 14.31                |
| Polyurethane (kg)                             | 3,593  | 3,593  | 1.00                 | 1.00                 |
| Electricity exported to grid (kWh)            | 5,045  | 5,846  | 1.40                 | 1.63                 |
| <b>Recovered streams</b>                      |        |        |                      |                      |
| AD Digestate cake - Bioavailable N (kg)       | 19     | 18     | 0.01                 | 0.01                 |

|                                         |         |         |       |       |
|-----------------------------------------|---------|---------|-------|-------|
| AD Effluent - Ammonia (kg)              | 233     | 228     | 0.06  | 0.06  |
| AD Effluent - Diammonium phosphate (kg) | 110     | 81      | 0.03  | 0.02  |
| Recycled water (L)                      | 105,285 | 107,533 | 29.30 | 29.93 |

\* Considered negligible for the LCA

Table S4. Material and energy requirements of the microalgae biorefinery to produce Bio-NIPU.<sup>2,5</sup>

| Basis                                         | per hour of operation             |                                   | per kg Bio-NIPU                   |                                   |
|-----------------------------------------------|-----------------------------------|-----------------------------------|-----------------------------------|-----------------------------------|
| Route                                         | Carboxylic acid (CA) intermediate | 2,3-butanediol (BDO) intermediate | Carboxylic acid (CA) intermediate | 2,3-butanediol (BDO) intermediate |
| <b>Process inputs</b>                         |                                   |                                   |                                   |                                   |
| <b>Feedstock</b>                              |                                   |                                   |                                   |                                   |
| Microalgae Biomass AFDW (kg)                  | 15,987                            | 15,987                            | 3.52                              | 3.52                              |
| <b>Pretreatment</b>                           |                                   |                                   |                                   |                                   |
| Sulfuric acid (93%) (kg)                      | 1,420                             | 1,420                             | 0.31                              | 0.31                              |
| Ammonia (kg)                                  | 459                               | 459                               | 0.10                              | 0.10                              |
| <b>Lipid extraction and clean-up</b>          |                                   |                                   |                                   |                                   |
| Hexane (kg)                                   | 84                                | 84                                | 0.02                              | 0.02                              |
| Ethanol (kg)                                  | 34                                | 34                                | 0.01                              | 0.01                              |
| Phosphoric acid (kg)                          | 46                                | 46                                | 0.01                              | 0.01                              |
| Silica (kg)                                   | 5                                 | 5                                 | 0.00                              | 0.00                              |
| Clay (kg)                                     | 9                                 | 9                                 | 0.00                              | 0.00                              |
| <b>Carboxylic Acid Conversion</b>             |                                   |                                   |                                   |                                   |
| Corn steep liquor (kg)                        | 721                               | N.A.                              | 0.16                              | N.A.                              |
| Diammonium phosphate (kg)                     | 75                                | N.A.                              | 0.02                              | N.A.                              |
| Hydrotalcite (kg)*                            | 1                                 | N.A.                              | $2.2 \times 10^{-4}$              | N.A.                              |
| Flocculant (kg)                               | 64                                | N.A.                              | 0.01                              | N.A.                              |
| Hexane (kg)                                   | 1                                 | N.A.                              |                                   | N.A.                              |
| <b>2,3-BDO Conversion</b>                     |                                   |                                   |                                   |                                   |
| Corn steep liquor (kg)                        | N.A.                              | 107                               | N.A.                              | 0.02                              |
| Diammonium phosphate (DAP, kg)                | N.A.                              | 13                                | N.A.                              | 0.00                              |
| Hydrogen (kg)                                 | N.A.                              | 89                                | N.A.                              | 0.02                              |
| Flocculant (kg)                               | N.A.                              | 64                                | N.A.                              | 0.01                              |
| Dehydration catalyst (kg)*                    | N.A.                              | 0.07                              | N.A.                              | $1.5 \times 10^{-5}$              |
| Oligomerization catalyst (kg)*                | N.A.                              | 0.13                              | N.A.                              | $2.9 \times 10^{-5}$              |
| <b>Final Fuel Upgrading (HDO/HI)</b>          |                                   |                                   |                                   |                                   |
| Hydrogen (kg)                                 | 107                               | 97                                | 0.02                              | 0.02                              |
| One step HDO/HI catalyst (1% Pt/SAPO-11, kg)* | 0.23                              | 0.25                              | $5.1 \times 10^{-5}$              | $5.5 \times 10^{-5}$              |
| <b>Nonisocyanate polyurethane</b>             |                                   |                                   |                                   |                                   |
| Toluene (kg)                                  | 54                                | 54                                | 0.01                              | 0.01                              |
| Acetic Acid (kg)                              | 461                               | 461                               | 0.10                              | 0.10                              |
| Hydrogen peroxide (kg)                        | 784                               | 784                               | 0.17                              | 0.17                              |
| Nitrogen (kg)                                 | 50                                | 50                                | 0.01                              | 0.01                              |
| Carbon dioxide (kg)                           | 1,352                             | 1,352                             | 0.30                              | 0.30                              |
| Tetrabutylammonium bromide (TBAB, kg)         | 247                               | 247                               | 0.05                              | 0.05                              |
| Hexane Diamine (HMDA, kg)                     | 936                               | 936                               | 0.21                              | 0.21                              |
| Ammonium Bicarbonate (kg)                     | 202                               | 202                               | 0.04                              | 0.04                              |
| Citric Acid (kg)                              | 98                                | 98                                | 0.02                              | 0.02                              |
| Triazabicyclodecene (kg)*                     | 12                                | 12                                | $2.6 \times 10^{-3}$              | $2.6 \times 10^{-3}$              |

|                                          |         |         |                      |                      |
|------------------------------------------|---------|---------|----------------------|----------------------|
| Surfactant (kg)                          | 20      | 20      | $4.4 \times 10^{-3}$ | $4.4 \times 10^{-3}$ |
| <b>Other Resource Consumption</b>        |         |         |                      |                      |
| Supplemental natural gas (Combined, MJ)  | 44,502  | 60,342  | 9.79                 | 13.28                |
| Supplemental natural gas (fuel-only, MJ) | 5,657   | 35,639  | 1.25                 | 7.84                 |
| Supplemental natural gas (PU-only, MJ)   | 45,127  | 59,081  | 9.93                 | 13.00                |
| Process water (Combined, L)              | 47,913  | 54,538  | 10.55                | 12.00                |
| Process water (fuel-only, L)             | 100     | 31,910  | 0.02                 | 7.02                 |
| Process water (PU-only, L)               | 17,113  | 17,105  | 3.77                 | 3.77                 |
| <b>Process outputs</b>                   |         |         |                      |                      |
| <b>CO2 Recycle</b>                       |         |         |                      |                      |
| CO2 (biogenic, kg)                       | 9,766   | 9,657   | 2.20                 | 2.18                 |
| CO2 (fossil, kg)                         | 6,042   | 9,523   | 1.36                 | 2.15                 |
| <b>Products</b>                          |         |         |                      |                      |
| Diesel (MJ)                              | 97,309  | 88,964  | 21.94                | 20.06                |
| Naphtha (MJ)                             | 40,265  | 51,410  | 9.08                 | 11.59                |
| Polyurethane (kg)                        | 4,436   | 4,436   | 1.00                 | 1.00                 |
| Electricity exported to grid (kWh)       | 3,377   | 4,178   | 0.76                 | 0.94                 |
| <b>Recovered streams</b>                 |         |         |                      |                      |
| AD Digestate cake - Bioavailable N (kg)  | 19      | 18      | 0.004                | 0.004                |
| AD Effluent - Ammonia (kg)               | 233     | 228     | 0.05                 | 0.05                 |
| AD Effluent - Diammonium phosphate (kg)  | 110     | 81      | 0.02                 | 0.02                 |
| Recycled water (L)                       | 105,285 | 107,533 | 23.74                | 24.24                |

\* Considered negligible for the LCA

## S2 Process-level approach information

Figure 1 in the main manuscript shows the process flow diagram utilized in the process-level approach calculations. As mentioned in the main manuscript this approach excluded the fuel processing stages and carried out a mass allocation for the intermediate products in each stage. The liquid hydrolysate and the free fatty acids were the intermediate streams that did not take part of the PU production pathway, as these are inputs for fuel processing. The residual biomass was considered a waste and was not included in the mass allocation factor estimations of the solvent extraction stage. The residual biomass was later processed through anaerobic digestion and combined heat and power (CHP). Ammonia and DAP were recycled to the cultivation stage and surplus electricity from CHP and digestate from AD were exported and assumed to displace grid electricity and calcium nitrate, respectively. The material and energy inputs involved with each stage are available in Table S5 and Table S6 for Bio-PU and Bio-NIPU, respectively.

Table S5. Material and energy inputs of the different stages in the process level approach per kg of Bio-PU.<sup>2,4</sup>

| Stage                                   | Pretreatment | Solid-liquid separation | Solvent extraction | Vacuum distillation | Polyurethane production | Anaerobic digestion |
|-----------------------------------------|--------------|-------------------------|--------------------|---------------------|-------------------------|---------------------|
| <b>Process inputs</b>                   |              |                         |                    |                     |                         |                     |
| Algae Biomass (DWAF) (kg)               | 4.449        |                         |                    |                     |                         |                     |
| Sulfuric acid (93%) (kg)                | 0.395        |                         |                    |                     |                         |                     |
| Ammonia (kg)                            | 0.128        |                         |                    |                     |                         |                     |
| Hexane (kg)                             |              |                         | 0.023              |                     |                         |                     |
| Ethanol (kg)                            |              |                         | 0.009              |                     |                         |                     |
| Phosphoric acid (oil cleanup) (kg)      |              |                         | 0.013              |                     |                         |                     |
| Silica (oil cleanup) (kg)               |              |                         | 0.001              |                     |                         |                     |
| Clay (oil cleanup) (kg)                 |              |                         | 0.003              |                     |                         |                     |
| Formic acid (kg)                        |              |                         |                    |                     | 0.097                   |                     |
| Hydrogen peroxide (kg)                  |              |                         |                    |                     | 0.153                   |                     |
| Nitrogen (kg)                           |              |                         |                    |                     | 0.014                   |                     |
| Toluene diisocyanate (kg)               |              |                         |                    |                     | 0.265                   |                     |
| Diethanolamine (kg)                     |              |                         |                    |                     | 0.003                   |                     |
| Surfactant (kg)                         |              |                         |                    |                     | 0.005                   |                     |
| Natural gas (MJ)                        | 4.894        |                         | 5.812              | 10.693              | 1.299                   | 1.679               |
| Water (L)                               | 1.595        | 4.136                   | 2.300              | 5.456               | 1.285                   | 0.325               |
| <b>Process outputs</b>                  |              |                         |                    |                     |                         |                     |
| Hydrolysate slurry (kg)                 | 23.324       |                         |                    |                     |                         |                     |
| Solids (kg)                             |              | 14.874                  |                    |                     |                         |                     |
| Liquids (kg)                            |              | 17.278                  |                    |                     |                         |                     |
| Lipids (kg)                             |              |                         | 1.270              |                     |                         |                     |
| Residual biomass (kg)                   |              |                         | 13.653             |                     |                         |                     |
| TAG (kg)                                |              |                         |                    | 0.626               |                         |                     |
| FFA (kg)                                |              |                         |                    | 0.550               |                         |                     |
| Polyurethane (kg)                       |              |                         |                    |                     | 1.000                   |                     |
| AD Digestate - Bioavailable N (kg)      |              |                         |                    |                     |                         | 0.005               |
| AD Effluent - Ammonia (kg)              |              |                         |                    |                     |                         | 0.065               |
| AD Effluent - Diammonium phosphate (kg) |              |                         |                    |                     |                         | 0.031               |
| Electricity exported to grid (MJ)       |              |                         |                    |                     |                         | 5.055               |
| Recycled water (L)                      |              |                         |                    |                     |                         | 29.303              |

|                    |  |  |  |  |  |       |
|--------------------|--|--|--|--|--|-------|
| CO2 (biogenic, kg) |  |  |  |  |  | 2.530 |
| CO2 (fossil, kg)   |  |  |  |  |  | 1.666 |

Table S6. Material and energy inputs of the different stages in the process level approach per kg of Bio-NIPU.<sup>2,5</sup>

| Stage                                      | Pretreatment | Solid-liquid separation | Solvent extraction | Vacuum distillation | Polyurethane production | Anaerobic digestion |
|--------------------------------------------|--------------|-------------------------|--------------------|---------------------|-------------------------|---------------------|
| <b>Process inputs</b>                      |              |                         |                    |                     |                         |                     |
| Algae Biomass (DWAF) (kg)                  | 3.519        |                         |                    |                     |                         |                     |
| Sulfuric acid (93%) (kg)                   | 0.313        |                         |                    |                     |                         |                     |
| Ammonia (kg)                               | 0.101        |                         |                    |                     |                         |                     |
| Hexane (kg)                                |              |                         | 0.018              |                     |                         |                     |
| Ethanol (kg)                               |              |                         | 0.007              |                     |                         |                     |
| Phosphoric acid (oil cleanup) (kg)         |              |                         | 0.010              |                     |                         |                     |
| Silica (oil cleanup) (kg)                  |              |                         | 0.001              |                     |                         |                     |
| Clay (oil cleanup) (kg)                    |              |                         | 0.002              |                     |                         |                     |
| Hydrogen peroxide (kg)                     |              |                         |                    |                     | 0.172                   |                     |
| Nitrogen (kg)                              |              |                         |                    |                     | 0.011                   |                     |
| Surfactant (kg)                            |              |                         |                    |                     | 0.004                   |                     |
| Toluene (kg)                               |              |                         |                    |                     | 0.012                   |                     |
| Acetic Acid (kg)                           |              |                         |                    |                     | 0.101                   |                     |
| Carbon dioxide (from flue gas capture, kg) |              |                         |                    |                     | 0.298                   |                     |
| TBAB (Tetrabutylammonium bromide, kg)      |              |                         |                    |                     | 0.054                   |                     |
| Hexane Diamine (HMDA, kg)                  |              |                         |                    |                     | 0.206                   |                     |
| Ammonium Bicarbonate (kg)                  |              |                         |                    |                     | 0.045                   |                     |
| Citric acid (kg)                           |              |                         |                    |                     | 0.022                   |                     |
| Natural gas (MJ)                           | 3.870        |                         | 4.596              | 8.456               | 1.476                   | 1.328               |
| Water (L)                                  | 1.261        | 3.271                   | 1.819              | 4.314               | 0.866                   | 0.257               |
| <b>Process outputs</b>                     |              |                         |                    |                     |                         |                     |
| Hydrolysate slurry (kg)                    | 18.445       |                         |                    |                     |                         |                     |
| Solids (kg)                                |              | 11.762                  |                    |                     |                         |                     |
| Liquids (kg)                               |              | 13.664                  |                    |                     |                         |                     |
| Lipids (kg)                                |              |                         | 1.004              |                     |                         |                     |
| Residual biomass (kg)                      |              |                         | 10.797             |                     |                         |                     |
| TAG (kg)                                   |              |                         |                    | 0.495               |                         |                     |
| FFA (kg)                                   |              |                         |                    | 0.435               |                         |                     |
| Polyurethane (kg)                          |              |                         |                    |                     | 1.000                   |                     |

|                                         |  |  |  |  |  |        |
|-----------------------------------------|--|--|--|--|--|--------|
| AD Digestate - Bioavailable N (kg)      |  |  |  |  |  | 0.004  |
| AD Effluent - Ammonia (kg)              |  |  |  |  |  | 0.051  |
| AD Effluent - Diammonium phosphate (kg) |  |  |  |  |  | 0.024  |
| Electricity exported to grid (MJ)       |  |  |  |  |  | 2.676  |
| Recycle water (L)                       |  |  |  |  |  | 23.173 |
| CO2 (biogenic, kg)                      |  |  |  |  |  | 2.149  |
| CO2 (fossil, kg)                        |  |  |  |  |  | 1.330  |



### S3 Life cycle inventory data for chemicals used in the microalgae biorefinery

The majority of the chemicals utilized in the biorefinery were sourced from the GREET model.<sup>1</sup> The life cycle inventory data of any missing chemicals was obtained or developed from literature. Table S7 to Table S12 present the inventory data of those chemicals that were not available in GREET.

Table S7. Life cycle inventory data for 1 kg of ammonium bicarbonate.

|                        |          |
|------------------------|----------|
| <b>Energy inputs</b>   |          |
| Electricity            | 1.163 MJ |
| <b>Material inputs</b> |          |
| Ammonia                | 0.227 kg |
| Carbon dioxide         | 0.586 kg |

Table S8. Life cycle inventory data for 1 kg of toluene from naphtha cracking.<sup>6</sup>

|                        |          |
|------------------------|----------|
| <b>Energy inputs</b>   |          |
| Natural gas            | 0.077 MJ |
| Electricity            | 1.187 MJ |
| <b>Material inputs</b> |          |
| Petroleum naphtha      | 1.000 kg |

Table S9. Life cycle inventory data for 1 kg of hexane diamine.<sup>7</sup>

|                                        |           |
|----------------------------------------|-----------|
| <b>Energy inputs</b>                   |           |
| Natural gas                            | 25.356 MJ |
| Electricity                            | 1.656 MJ  |
| <b>Material inputs</b>                 |           |
| Butadiene                              | 0.545 kg  |
| Natural gas as feedstock               | 31.896 MJ |
| Phosphoric acid                        | 0.005 kg  |
| Ammonia                                | 0.409 kg  |
| Hydrogen                               | 0.067 kg  |
| Sodium sulfate                         | 0.176 kg  |
| Make-up water                          | 67.144 L  |
| <b>Non-combustion emissions to air</b> |           |
| Carbon dioxide                         | 0.616 kg  |

Table S10. Life cycle inventory data for 1 kg of tributyl amine.<sup>8</sup>

|                         |          |
|-------------------------|----------|
| <b>Energy inputs</b>    |          |
| Natural gas             | 0.097 MJ |
| <b>Material inputs</b>  |          |
| Ammonia                 | 0.092 kg |
| 1-butanol               | 1.200 kg |
| <b>Byproduct output</b> |          |
| Water                   | 0.263 L  |

Table S11. Life cycle inventory data for 1 kg of 1-bromobutane.<sup>9,10</sup>

|                        |          |
|------------------------|----------|
| <b>Energy inputs</b>   |          |
| Natural gas            | 0.082 MJ |
| <b>Material inputs</b> |          |
| 1-butene               | 0.409 kg |
| Hydrogen bromide       | 0.590 kg |

Table S12. Life cycle inventory data for 1 kg of tetrabutylammonium bromide.<sup>8</sup>

|                        |          |
|------------------------|----------|
| <b>Energy inputs</b>   |          |
| Electricity            | 0.649 MJ |
| <b>Material inputs</b> |          |
| Tributylamine          | 0.575 kg |
| 1-bromobutane          | 0.425 kg |

## S4 Carbon balance in the biorefinery

The carbon balance determined the biogenic carbon content in the Bio-PU and Bio-NIPU. The carbon in microalgae TAG is formed from the CO<sub>2</sub> sequestered from pulverized coal plants. This uptake of CO<sub>2</sub> is the only carbon source considered during cultivation. Except for the CO<sub>2</sub> utilized in carbonation, all the additional reactants utilized in the PU synthesis stage were assumed to be obtained from fossil-carbon sources. The flow of the different reactants per kg of Bio-PU or Bio-NIPU (see Table S3 and Table S4) was multiplied by their corresponding carbon content (estimated from their chemical formula). The carbon content of the waste and vented streams (i.e., wastewater and CO<sub>2</sub> vented) was obtained from the Aspen Plus simulation. Carbon flows of solvents and other non-reacting materials were not included in the balance. Figure S1 shows the input and output carbon flows of the different stages involved in the conversion of TAG to PU. Carbon flows labeled as “uptake” indicate carbon sequestered from CO<sub>2</sub> from power plants, while those marked as “fossil” are associated to chemicals obtained from crude oil or natural gas. Only half of the amount of the CO<sub>2</sub> for carbonation is becoming part of the cyclic carbonates while the remaining 50% is vented to the atmosphere, with additional CO<sub>2</sub> produced during epoxidation.<sup>5</sup> To emphasize these features, the carbon flow from the CO<sub>2</sub> for carbonation flow is labeled as “captured for processing”. Figure S1 indicates that the carbon uptake in Bio-PU and Bio-NIPU is estimated at 0.48 and 0.42 kg C/kg, respectively. These values are divided by the carbon content of CO<sub>2</sub> (0.27 kg C/kg) to calculate the carbon uptake credits of the PU, which resulted in 1.78 and 1.40 kg CO<sub>2</sub> e/kg of Bio-PU and Bio-NIPU respectively.

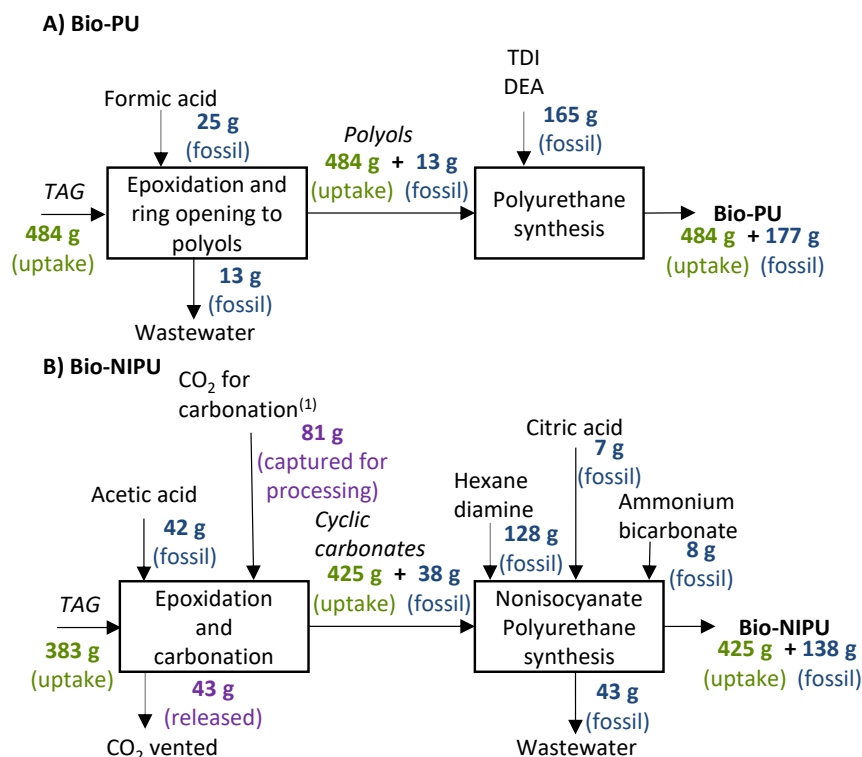

Figure S1. Carbon balance for one kg of microalgae-based PU foam of the two pathways analyzed: A) Production of Bio-PU and B) Production of Bio-NIPU. (1) Only half of the amount of CO<sub>2</sub> for carbonation is becoming part of cyclic carbonates. TAG: Triglycerides, TDI: Toluene

diisocyanate, DEA: Diethanolamine, Bio-PU: Bio-based polyurethane, Bio-NIPU: Bio-based non-isocyanate polyurethane.

## S5. Scenario analysis data

The comparison between the energy and material requirements for the CO<sub>2</sub> sourcing and microalgae cultivation is presented in Table S13 and Table S14, respectively. The data shown in the tables shows the expected reduction in the energy requirements in the futuristic projection.

Table S13. Comparison of the energy requirements for the sourcing of 1 kg of CO<sub>2</sub> in the 2022 state-of-technology (SOT) and the 2030 projection.<sup>2,11</sup>

| Energy inputs | 2022 SOT | 2030 projection |
|---------------|----------|-----------------|
| Natural gas   | 2.244 MJ | 0.689 MJ        |
| Electricity   | 0.368 MJ | 0.368 MJ        |

Table S14. Comparison of the material and energy requirements for the cultivation of 1 kg of AFDW *Scenedesmus* in the 2022 SOT and the 2030 projection.<sup>2,11</sup>

|                         | 2022 SOT | 2030 projection |
|-------------------------|----------|-----------------|
| <b>Energy inputs</b>    |          |                 |
| Electricity             | 2.120 MJ | 1.312 MJ        |
| <b>Nutrient sources</b> |          |                 |
| Ammonia                 | 0.020 kg | 0.020 kg        |
| Diammonium phosphate    | 0.010 kg | 0.010 kg        |
| Carbon dioxide          | 2.220 kg | 2.672 kg        |
| <b>Other materials</b>  |          |                 |
| Concrete                | 0.024 kg | 0.017 kg        |
| Steel                   | 0.001 kg | 0.001 kg        |
| Plastic                 | 0.005 kg | 0.004 kg        |
| Cast iron               | 0.003 kg | 0.002 kg        |

The life cycle inventory data for the production of Bio-NIPU with pentane diamine is presented in Table S15 and Table S16 for the system and process level approaches, respectively.

Table S15. Material and energy requirements of the microalgae biorefinery to produce Bio-NIPU using biobased pentane diamine.<sup>2,5</sup>

| Basis                                | per hour of operation             |                                   | per kg Bio-NIPU                   |                                   |
|--------------------------------------|-----------------------------------|-----------------------------------|-----------------------------------|-----------------------------------|
| Route                                | Carboxylic acid (CA) intermediate | 2,3-butanediol (BDO) intermediate | Carboxylic acid (CA) intermediate | 2,3-butanediol (BDO) intermediate |
| <b>Process inputs</b>                |                                   |                                   |                                   |                                   |
| <b>Feedstock</b>                     |                                   |                                   |                                   |                                   |
| Microalgae Biomass AFDW (kg)         | 15,987                            | 15,987                            | 3.60                              | 3.60                              |
| <b>Pretreatment</b>                  |                                   |                                   |                                   |                                   |
| Sulfuric acid (93%) (kg)             | 1,420                             | 1,420                             | 0.32                              | 0.32                              |
| Ammonia (kg)                         | 459                               | 459                               | 0.10                              | 0.10                              |
| <b>Lipid extraction and clean-up</b> |                                   |                                   |                                   |                                   |
| Hexane (kg)                          | 84                                | 84                                | 0.02                              | 0.02                              |

|                                               |        |        |                      |                      |
|-----------------------------------------------|--------|--------|----------------------|----------------------|
| Ethanol (kg)                                  | 34     | 34     | 0.01                 | 0.01                 |
| Phosphoric acid (kg)                          | 46     | 46     | 0.01                 | 0.01                 |
| Silica (kg)                                   | 5      | 5      | 0.00                 | 0.00                 |
| Clay (kg)                                     | 9      | 9      | 0.00                 | 0.00                 |
| <b>Carboxylic Acid Conversion</b>             |        |        |                      |                      |
| Corn steep liquor (kg)                        | 721    | N.A.   | 0.16                 | N.A.                 |
| Diammonium phosphate (kg)                     | 75     | N.A.   | 0.02                 | N.A.                 |
| Hydrotalcite (kg)*                            | 1      | N.A.   | $2.3 \times 10^{-4}$ | N.A.                 |
| Flocculant (kg)                               | 64     | N.A.   | 0.01                 | N.A.                 |
| Hexane (kg)                                   | 1      | N.A.   | $2.3 \times 10^{-4}$ | N.A.                 |
| <b>2,3-BDO Conversion</b>                     |        |        |                      |                      |
| Corn steep liquor (kg)                        | N.A.   | 107    | N.A.                 | 0.02                 |
| Diammonium phosphate (DAP, kg)                | N.A.   | 13     | N.A.                 | 0.00                 |
| Hydrogen (kg)                                 | N.A.   | 89     | N.A.                 | 0.02                 |
| Flocculant (kg)                               | N.A.   | 64     | N.A.                 | 0.01                 |
| Dehydration catalyst (kg)*                    | N.A.   | 0.07   | N.A.                 | $1.6 \times 10^{-5}$ |
| Oligomerization catalyst (kg)*                | N.A.   | 0.13   | N.A.                 | $2.9 \times 10^{-5}$ |
| <b>Final Fuel Upgrading (HDO/HI)</b>          |        |        |                      |                      |
| Hydrogen (kg)                                 | 107    | 97     | 0.02                 | 0.02                 |
| One step HDO/HI catalyst (1% Pt/SAPO-11, kg)* | 0.23   | 0.25   | $5.2 \times 10^{-5}$ | $5.6 \times 10^{-5}$ |
| <b>Nonisocyanate polyurethane</b>             |        |        |                      |                      |
| Toluene (kg)                                  | 54     | 54     | 0.01                 | 0.01                 |
| Acetic Acid (kg)                              | 461    | 461    | 0.10                 | 0.10                 |
| Hydrogen peroxide (kg)                        | 784    | 784    | 0.18                 | 0.18                 |
| Nitrogen (kg)                                 | 50     | 50     | 0.01                 | 0.01                 |
| Carbon dioxide (kg)                           | 1,352  | 1,352  | 0.30                 | 0.30                 |
| Tetrabutylammonium bromide (TBAB, kg)         | 247    | 247    | 0.06                 | 0.06                 |
| Biobased Pentane Diamine (kg)                 | 828    | 828    | 0.19                 | 0.19                 |
| Ammonium Bicarbonate (kg)                     | 202    | 202    | 0.05                 | 0.05                 |
| Citric Acid (kg)                              | 98     | 98     | 0.02                 | 0.02                 |
| Triazabicyclodecene (kg)*                     | 12     | 12     | $2.7 \times 10^{-3}$ | $2.7 \times 10^{-3}$ |
| Surfactant (kg)                               | 20     | 20     | $4.5 \times 10^{-3}$ | $4.5 \times 10^{-3}$ |
| <b>Other Resource Consumption</b>             |        |        |                      |                      |
| Supplemental natural gas (Combined, MJ)       | 44,502 | 60,342 | 10.03                | 13.60                |
| Supplemental natural gas (fuel-only, MJ)      | 5,657  | 35,639 | 1.28                 | 8.03                 |
| Supplemental natural gas (PU-only, MJ)        | 45,126 | 59,080 | 10.17                | 13.32                |
| Process water (Combined, L)                   | 47,913 | 54,538 | 10.80                | 12.30                |
| Process water (fuel-only, L)                  | 100    | 31,910 | 0.02                 | 7.19                 |
| Process water (PU-only, L)                    | 17,146 | 17,138 | 3.86                 | 3.86                 |
| <b>Process outputs</b>                        |        |        |                      |                      |
| <b>CO2 Recycle</b>                            |        |        |                      |                      |
| CO2 (biogenic, kg)                            | 9,766  | 9,657  | 2.15                 | 2.13                 |
| CO2 (fossil, kg)                              | 6,042  | 9,523  | 1.33                 | 2.10                 |
| <b>Products</b>                               |        |        |                      |                      |
| Diesel (MJ)                                   | 97,309 | 88,964 | 21.42                | 19.58                |
| Naphtha (MJ)                                  | 40,265 | 51,410 | 8.86                 | 11.32                |
| Polyurethane (kg)                             | 4,436  | 4,436  | 1.00                 | 1.00                 |
| Electricity exported to grid (kWh)            | 3,377  | 4,178  | 0.74                 | 0.92                 |
| <b>Recovered streams</b>                      |        |        |                      |                      |

|                                         |         |         |       |       |
|-----------------------------------------|---------|---------|-------|-------|
| AD Digestate cake - Bioavailable N (kg) | 19      | 18      | 0.004 | 0.004 |
| AD Effluent - Ammonia (kg)              | 233     | 228     | 0.05  | 0.05  |
| AD Effluent - Diammonium phosphate (kg) | 110     | 81      | 0.02  | 0.02  |
| Recycled water (L)                      | 105,285 | 107,533 | 23.17 | 23.67 |

\* Considered negligible for the LCA

Table S16. Material and energy inputs of the different stages in the process level approach per kg of Bio-NIPU using pentane diamine.<sup>2,5</sup>

| Stage                                      | Pretreatment | Solid-liquid separation | Solvent extraction | Vacuum distillation | Polyurethane production | Anaerobic digestion |
|--------------------------------------------|--------------|-------------------------|--------------------|---------------------|-------------------------|---------------------|
| <b>Process inputs</b>                      |              |                         |                    |                     |                         |                     |
| Algae Biomass (DWAF) (kg)                  | 3.604        |                         |                    |                     |                         |                     |
| Sulfuric acid (93%) (kg)                   | 0.320        |                         |                    |                     |                         |                     |
| Ammonia (kg)                               | 0.103        |                         |                    |                     |                         |                     |
| Hexane (kg)                                |              |                         | 0.019              |                     |                         |                     |
| Ethanol (kg)                               |              |                         | 0.008              |                     |                         |                     |
| Phosphoric acid (oil cleanup) (kg)         |              |                         | 0.010              |                     |                         |                     |
| Silica (oil cleanup) (kg)                  |              |                         | 0.001              |                     |                         |                     |
| Clay (oil cleanup) (kg)                    |              |                         | 0.002              |                     |                         |                     |
| Hydrogen peroxide (kg)                     |              |                         |                    |                     | 0.177                   |                     |
| Nitrogen (kg)                              |              |                         |                    |                     | 0.011                   |                     |
| Surfactant (kg)                            |              |                         |                    |                     | 0.005                   |                     |
| Toluene (kg)                               |              |                         |                    |                     | 0.012                   |                     |
| Acetic Acid (kg)                           |              |                         |                    |                     | 0.104                   |                     |
| Carbon dioxide (from flue gas capture, kg) |              |                         |                    |                     | 0.305                   |                     |
| TBAB (Tetrabutylammonium bromide, kg)      |              |                         |                    |                     | 0.056                   |                     |
| Biobased Pentane Diamine (kg)              |              |                         |                    |                     | 0.187                   |                     |
| Ammonium Bicarbonate (kg)                  |              |                         |                    |                     | 0.046                   |                     |
| Citric acid (kg)                           |              |                         |                    |                     | 0.022                   |                     |
| Natural gas (MJ)                           | 3.964        |                         | 4.708              | 8.662               | 1.512                   | 1.360               |
| Water (L)                                  | 1.292        | 3.350                   | 1.863              | 4.419               | 0.879                   | 0.263               |
| <b>Process outputs</b>                     |              |                         |                    |                     |                         |                     |
| Hydrollysate slurry (kg)                   | 18.892       |                         |                    |                     |                         |                     |
| Solids (kg)                                |              | 12.048                  |                    |                     |                         |                     |
| Liquids (kg)                               |              | 13.995                  |                    |                     |                         |                     |
| Lipids (kg)                                |              |                         | 1.029              |                     |                         |                     |
| Residual biomass (kg)                      |              |                         | 11.059             |                     |                         |                     |
| TAG (kg)                                   |              |                         |                    | 0.507               |                         |                     |
| FFA (kg)                                   |              |                         |                    | 0.445               |                         |                     |

|                                         |  |  |  |  |       |        |
|-----------------------------------------|--|--|--|--|-------|--------|
| Polyurethane (kg)                       |  |  |  |  | 1.000 |        |
| AD Digestate - Bioavailable N (kg)      |  |  |  |  |       | 0.004  |
| AD Effluent - Ammonia (kg)              |  |  |  |  |       | 0.053  |
| AD Effluent - Diammonium phosphate (kg) |  |  |  |  |       | 0.025  |
| Electricity exported to grid (MJ)       |  |  |  |  |       | 2.741  |
| Recycled water (L)                      |  |  |  |  |       | 23.736 |
| CO2 (biogenic, kg)                      |  |  |  |  |       | 2.202  |
| CO2 (fossil, kg)                        |  |  |  |  |       | 1.362  |

Additional information to perform the energy and market-value allocation is presented in Table S17 and Table S18, respectively.

Table S17. Energy content of the coproducts from the biorefinery.

| <b>Coproduct</b>  | <b>Energy content</b> | <b>Source</b>                   |
|-------------------|-----------------------|---------------------------------|
| Renewable diesel  | 42.79 MJ/kg           | GREET <sup>1</sup>              |
| Renewable naphtha | 44.94 MJ/kg           | GREET <sup>1</sup>              |
| PU flexible foam  | 30.51 MJ/kg           | Hasanzadeh et al. <sup>12</sup> |
| PU rigid foam     | 31.21 MJ/kg           | Hasanzadeh et al. <sup>12</sup> |

Table S18. Prices of the coproducts from the biorefinery.

| <b>Coproduct</b> | <b>Price</b>  | <b>Source</b>                                 |
|------------------|---------------|-----------------------------------------------|
| Renewable fuels  | 2.50 USD/GGE* | Cai et al. <sup>2</sup>                       |
| Electricity      | 0.166 USD/kWh | U.S. Bureau of Labor Statistics <sup>13</sup> |
| PU foam          | 4.50 USD/kg   | Cai et al. <sup>2</sup>                       |

\* For the estimations a conversion factor of 120 MJ per GGE was used.<sup>1,14</sup>

A synthesized description of the four coproduct treatment methods evaluated during this study is presented in Table S19 to improve clarity.

Table S19. Description of coproducts treatment methods used for the microalgae-based PU foam.

| <b>Method</b>           | <b>Description</b>                                                                                                                                                                                                                                      |
|-------------------------|---------------------------------------------------------------------------------------------------------------------------------------------------------------------------------------------------------------------------------------------------------|
| Hybrid method           | Material and energy inputs allocation by mass to naphtha, diesel, and PU<br>Credits from displacement grid electricity (allocated by mass to naphtha, diesel, and PU)<br>Credits from displaced nitrogen (allocated by mass to naphtha, diesel, and PU) |
| Market-value allocation | Material and energy inputs allocation by market-value to naphtha, diesel, electricity, and PU<br>Credits from displaced nitrogen (allocated by market-value to naphtha, diesel, electricity, and PU)                                                    |



|                   |                                                                                                                                                                                                                                                                                                                |
|-------------------|----------------------------------------------------------------------------------------------------------------------------------------------------------------------------------------------------------------------------------------------------------------------------------------------------------------|
| Energy allocation | <p>Material and energy inputs allocation by energy to naphtha, diesel, electricity, and PU</p> <p>Credits from displaced nitrogen (allocated by energy to naphtha, diesel, electricity, and PU)</p>                                                                                                            |
| Displacement      | <p>Subtract the emissions of the co-products, assuming displacement of conventional counterparts</p> <p><b>Naphtha:</b> Displaces conventional petroleum naphtha</p> <p><b>Diesel:</b> Displaces conventional petroleum diesel</p> <p><b>Electricity:</b> Displaces electricity from the average U.S. grid</p> |

## S6. Additional results

### S6.1 Analysis of additional indicators and scenarios

Figure S2 presents the results of GHG emissions with a breakdown of the emissions associated to the material and energy feedstocks. Figure S3 and Figure S4 show the results of the fossil energy and water consumption, respectively, that are discussed in the main manuscript. Figure S5 shows the breakdown of the GHG emission results by process stage but with the use of renewable electricity.

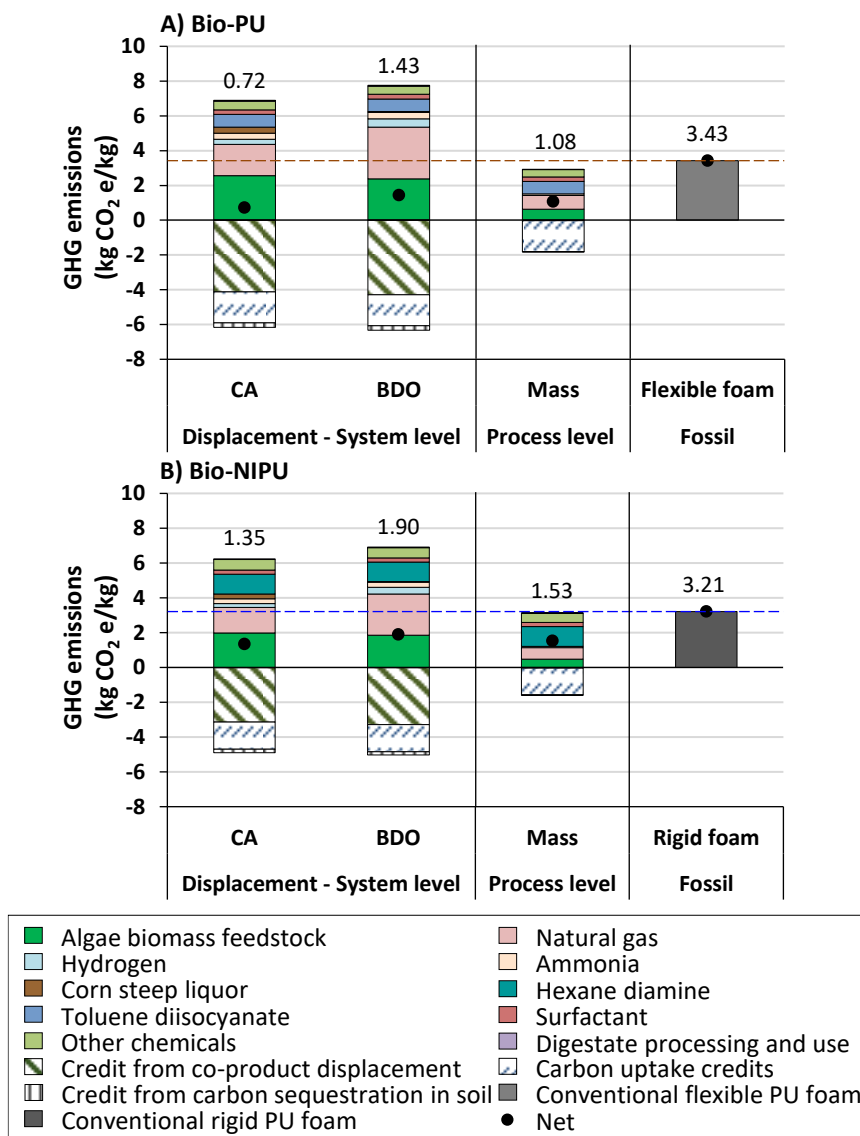

Figure S2. GHG emissions of the production of A) Bio-PU and B) Bio-NIPU with a breakdown of the emissions associated to material and energy inputs. The orange and blue dashed lines indicate the GHG emissions of conventional flexible and rigid PU foam, respectively. The credit from coproduct displacement comprises the avoided GHG emissions to produce conventional diesel and gasoline blendstock and generation of grid electricity.

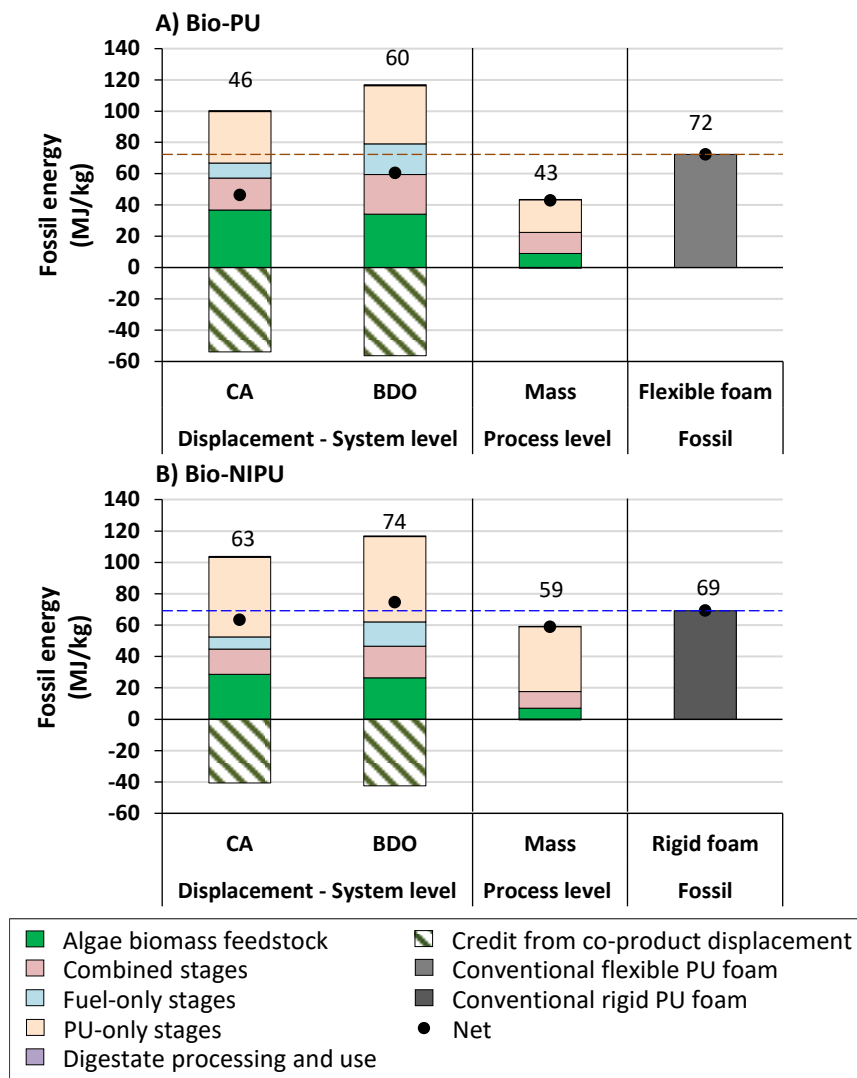

Figure S3. Fossil energy of the production of A) Bio-PU and B) Bio-NIPU. The orange and blue dashed lines indicate the GHG emissions of conventional flexible and rigid PU foam, respectively. The credit from coproduct displacement comprises the avoided fossil energy to produce conventional diesel and gasoline blendstock and generation of grid electricity.

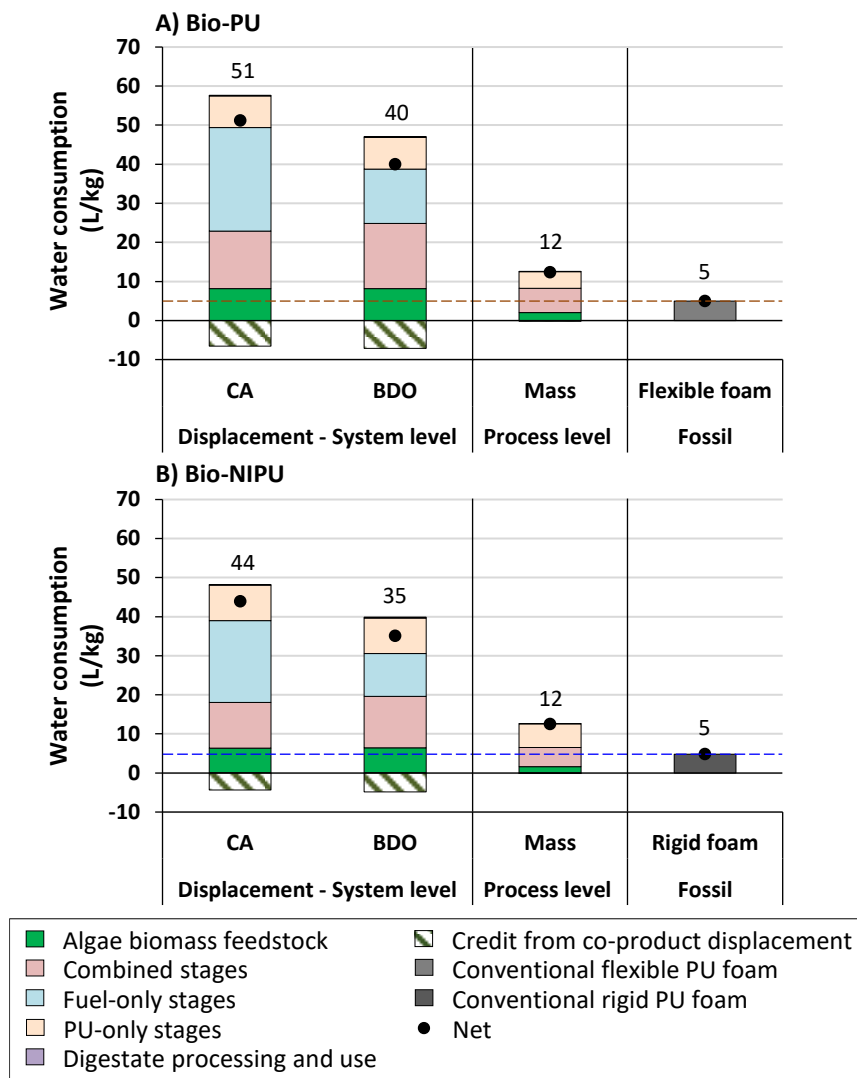

Figure S4. Water consumption of the production of A) Bio-PU and B) Bio-NIPU. The orange and blue dashed lines indicate the GHG emissions of conventional flexible and rigid PU foam, respectively. The credit from coproduct displacement comprises the avoided water consumption to produce conventional diesel and gasoline blendstock and generation of grid electricity.

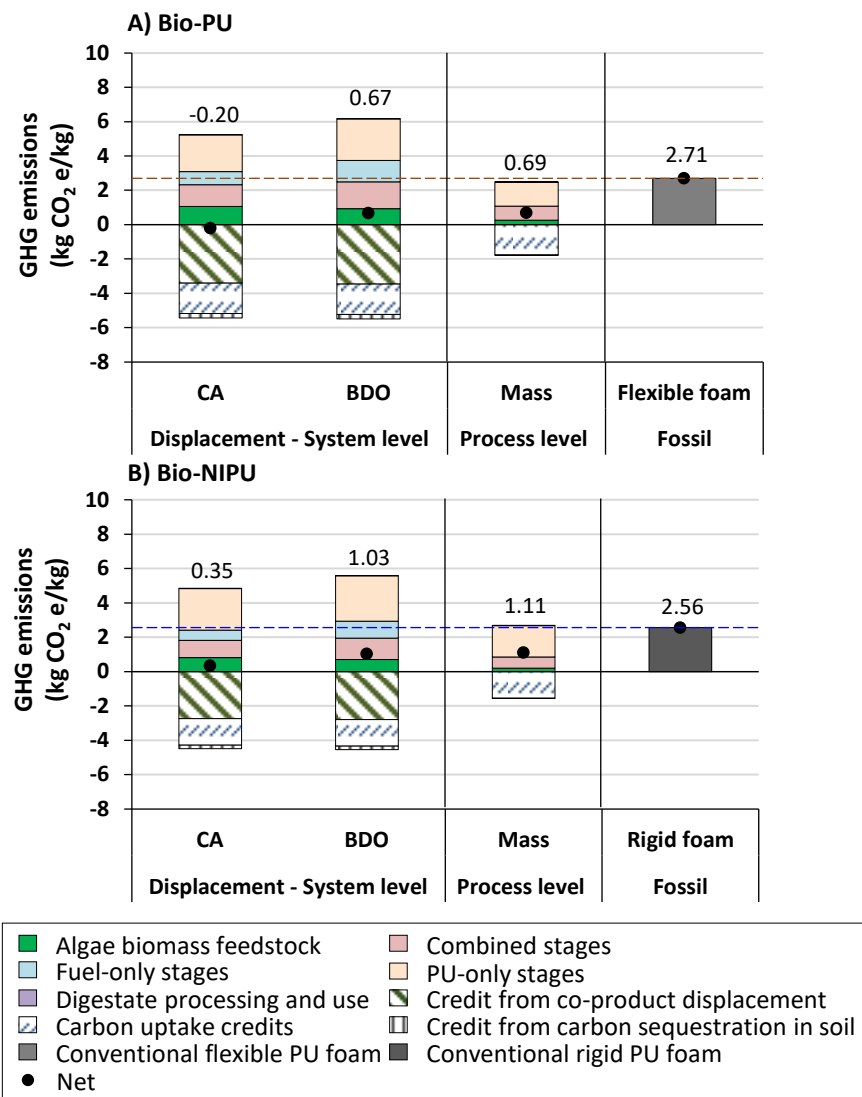

Figure S5. GHG emissions of the production of A) Bio-PU and B) Bio-NIPU under the use of renewable electricity (wind power). The orange and blue dashed lines indicate the GHG emissions of conventional flexible and rigid PU foam, respectively. The credit from coproduct displacement comprises the avoided GHG emissions to produce conventional diesel and gasoline blendstock.

### *S6.2 GHG emissions of fuels produced from the microalgae biorefinery*

An alternative analysis was conducted to estimate the GHG emissions in a different context when viewing fuels as the main product and PU/NIPU as the coproduct in the microalgae biorefinery. This analysis followed the system-level approach described in section 2.1.1.1 of the main manuscript, incorporating not only the GHG emissions estimated through displacement but also mass and market-value allocation methods. The functional unit used was one megajoule (MJ) of fuel. Since renewable diesel and naphtha follow the same conversion pathway, they are treated as a single product, with the same allocation factors applied in the distribution of the GHG emissions between the other coproducts: PU and electricity. After estimating the GHG emissions for the combined fuel, they are disaggregated using an energy allocation factor. However, as the results are reported per MJ of fuel, the emissions for both renewable diesel and naphtha are numerically similar, and thus both are reported through a single value as renewable fuels.

The GHG emissions from renewable fuels produced in the microalgae biorefinery under different coproduct treatment methods are shown in Figure S6. The GHG emissions ranged between 23.9 to 84.5 g CO<sub>2</sub>e/MJ. Similarly, to what was observed with Bio-PU and Bio-NIPU results, the GHG emissions associated with the CA route were lower than those of the BDO route, due to the higher natural gas and chemical requirements of the latter. Moreover, fuels derived by a biorefinery producing Bio-PU showed lower GHG emissions than those from a Bio-NIPU biorefinery, except under the market allocation approach which brought fuel GHG emissions for Bio-NIPU co-production lower than those for Bio-PU due to allocating a higher GHG fraction to the more valuable coproduct. Although the Bio-NIPU biorefinery had lower GHG emissions from feedstock requirements and more coproduct displacement than the Bio-PU biorefinery, the higher GHG emissions of the conversion process led to the overall higher GHG emissions of renewable diesel in the Bio-NIPU route.

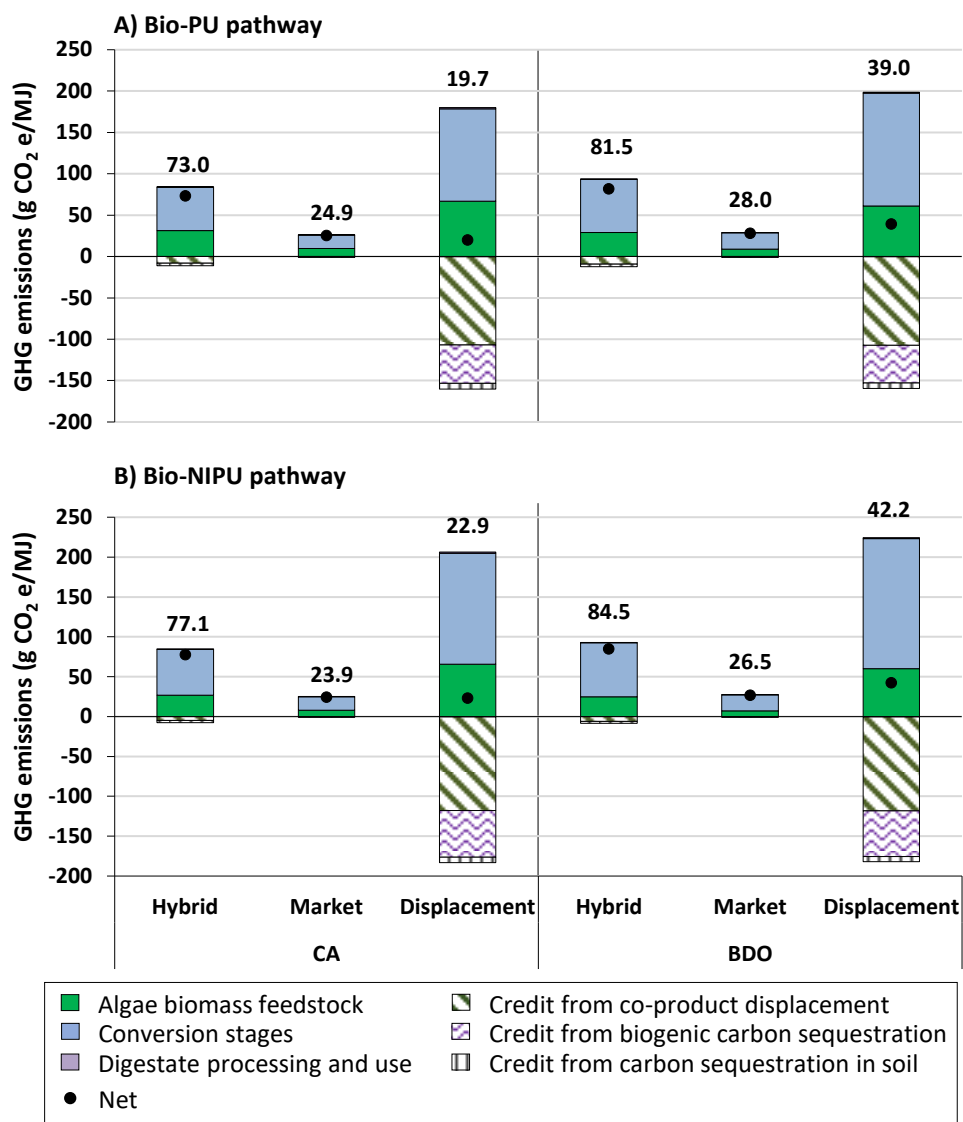

Figure S6. GHG emissions of the production of fuels from A) the Bio-PU pathway and B) the Bio-NIPU pathway. The credit from coproduct displacement comprises the avoided GHG emissions to produce conventional PU and grid electricity.

### S6.3 Scenario, sensitivity, and uncertainty analyses

Figure S7 presents the biorefinery-level analysis for substituting natural gas with renewable natural gas. For Bio-PU and Bio-NIPU under the CA and BDO routes. Figure S8 and Figure S9, show the results of the sensitivity and uncertainty analysis for Bio-PU and Bio-NIPU, respectively. The results shown in these Figures are discussed in the main manuscript.

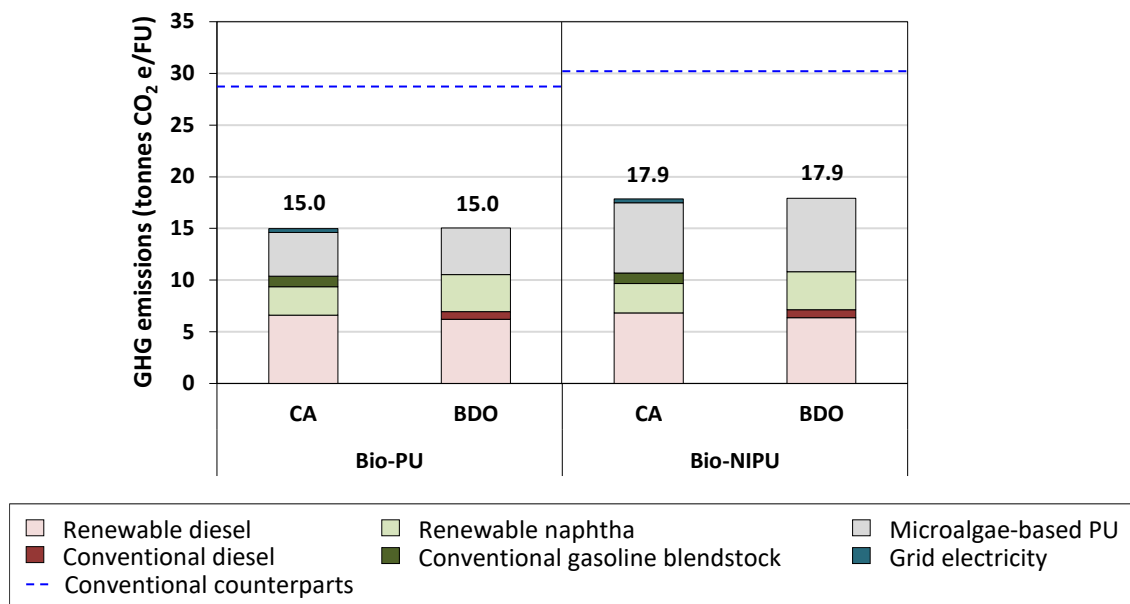

Figure S7. GHG emissions for the scenario analysis substituting natural gas with renewable natural gas at the biorefinery-level. The dashed lines indicate the GHG emissions of conventional counterparts.



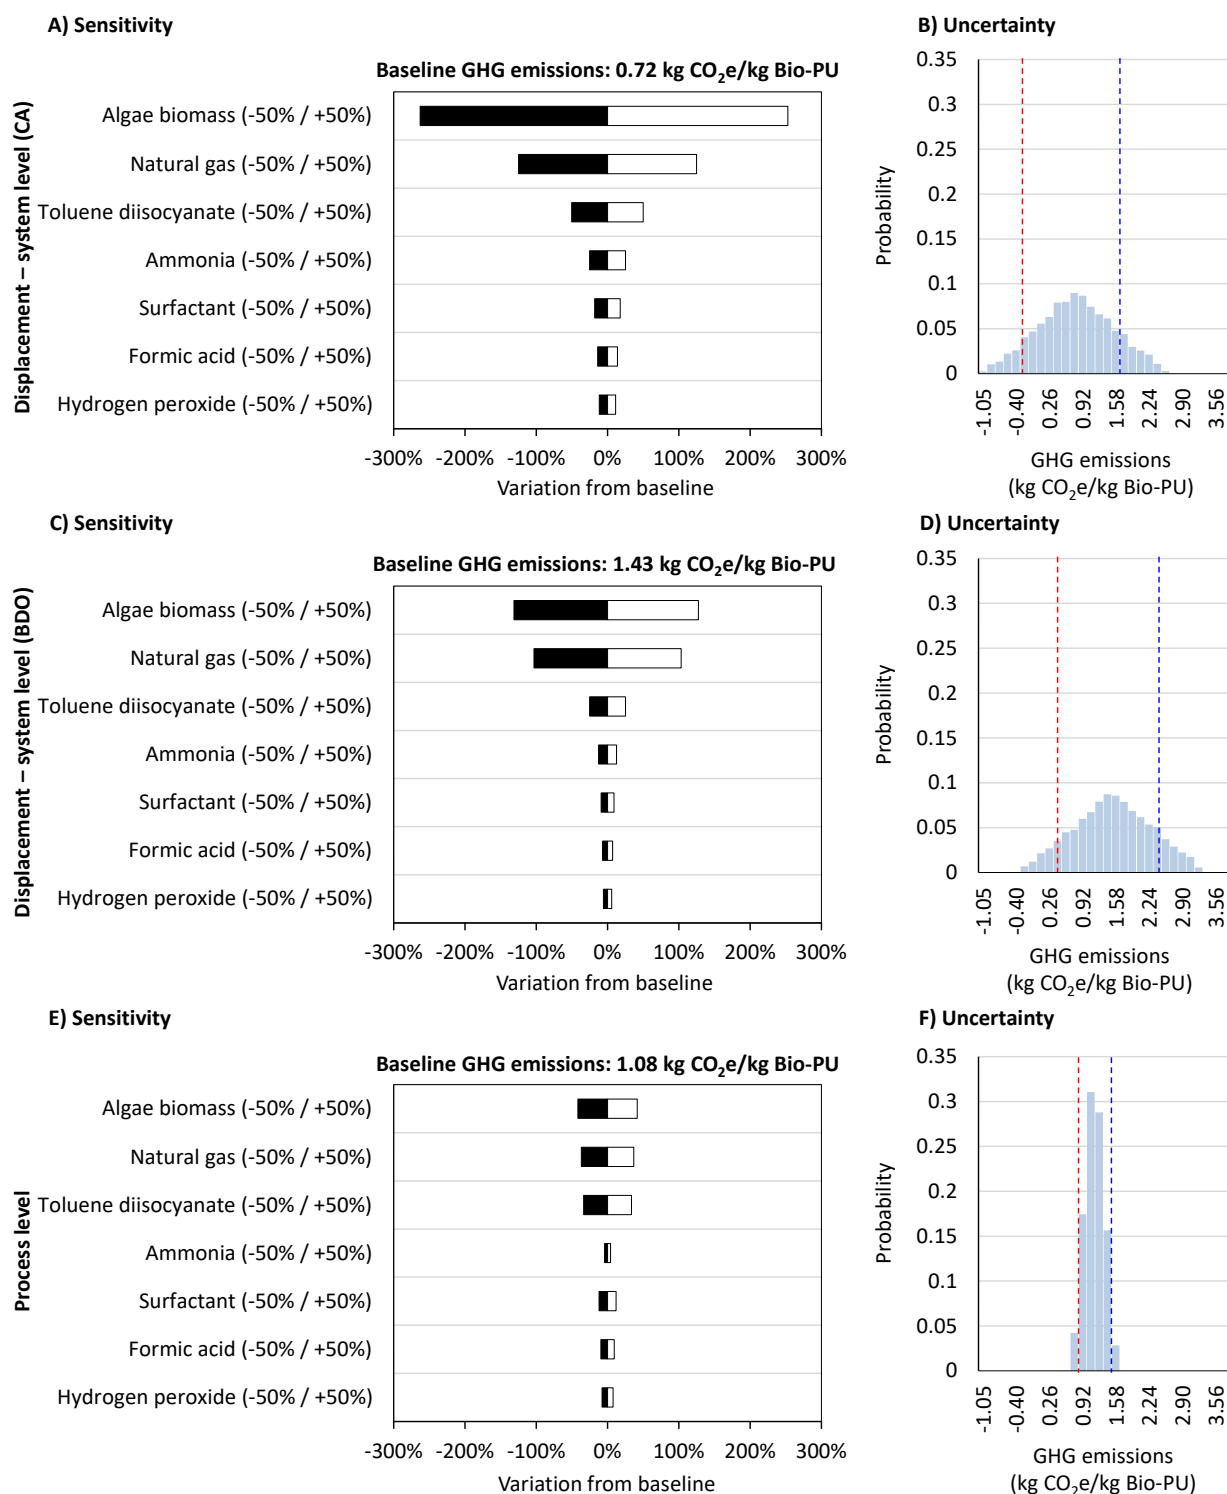

Figure S8. Sensitivity (A, C, and E) and uncertainty (B, D, and F) analyses of the GHG emissions for Bio-PU under displacement – system level (CA and BDO routes) and process level approaches. Red and blue dashed lines indicate the 10<sup>th</sup> and 90<sup>th</sup> percentiles, respectively.

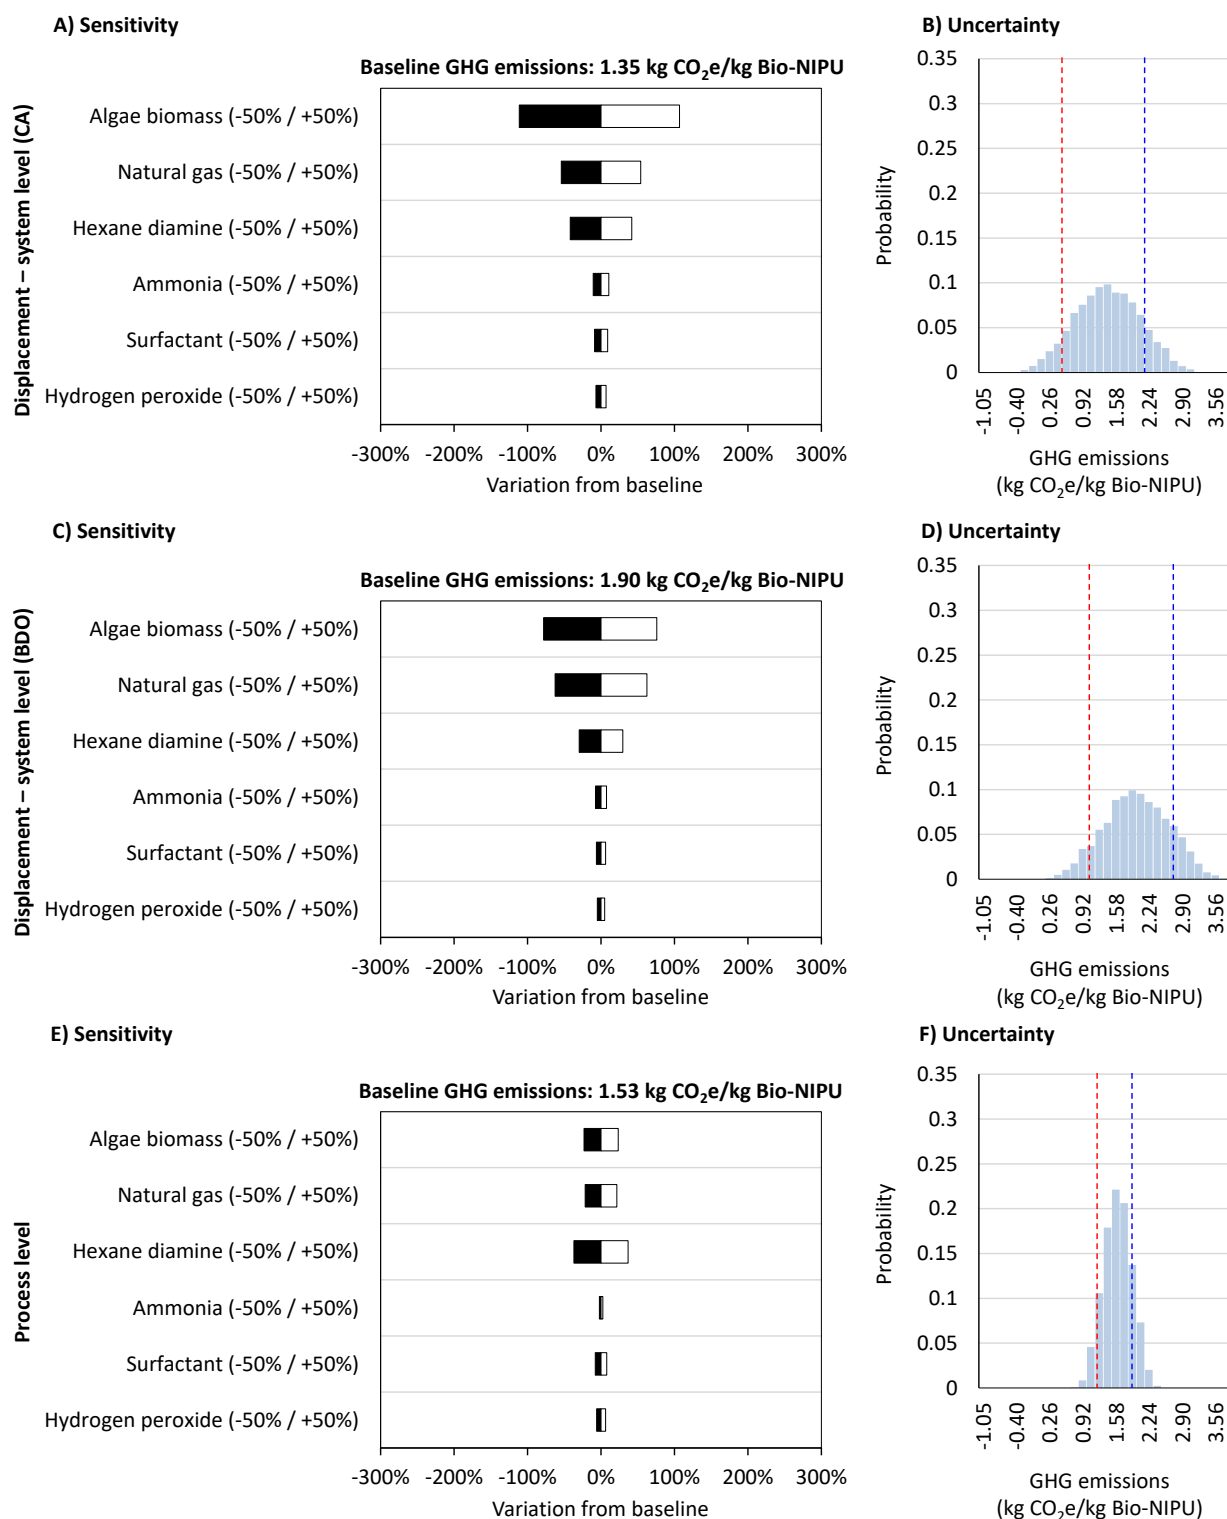

Figure S9. Sensitivity (A, C, and E) and uncertainty (B, D, and F) analyses of the GHG emissions for Bio-NIPU under displacement – system level (CA and BDO routes) and process level approaches. Red and blue dashed lines indicate the 10<sup>th</sup> and 90<sup>th</sup> percentiles, respectively.

#### S6.4 Tabulated data from Figures

Tabulated data for Figure 2 of the main manuscript is presented in Table S20 and Table S21 and tabulated data for Figure S2, Figure S3, Figure S4, and Figure S5 in this SI is presented below in Table S22, Table S23, Table S24, and Table S25, respectively.

Table S20. Tabulated data of the GHG emissions results (kg CO<sub>2</sub> e/kg) presented in Figures 2A and 2B of the main manuscript.

| Product                                  | Bio-PU                         |       |                  | Bio-NIPU                       |       |                  |
|------------------------------------------|--------------------------------|-------|------------------|--------------------------------|-------|------------------|
| Case                                     | Displacement<br>- System level |       | Process<br>level | Displacement<br>- System level |       | Process<br>level |
|                                          | CA                             | BDO   | Mass             | CA                             | BDO   | Mass             |
| Algae biomass feedstock                  | 2.56                           | 2.38  | 0.63             | 1.99                           | 1.85  | 0.49             |
| Combined stages                          | 1.29                           | 1.59  | 0.82             | 1.02                           | 1.26  | 0.65             |
| Fuel-only stages                         | 0.80                           | 1.26  | 0.00             | 0.63                           | 1.00  | 0.00             |
| PU-only stages                           | 2.19                           | 2.46  | 1.45             | 2.57                           | 2.78  | 1.98             |
| Credits due to nutrient recovery         | -0.01                          | -0.01 | 0.00             | -0.01                          | -0.01 | 0.00             |
| Credit from co-product displacement      | -4.12                          | -4.28 | -0.03            | -3.13                          | -3.27 | -0.02            |
| Carbon uptake credits                    | -1.78                          | -1.78 | -1.78            | -1.55                          | -1.55 | -1.55            |
| Credit from carbon sequestration in soil | -0.26                          | -0.25 | -0.01            | -0.21                          | -0.20 | -0.01            |
| Digestate processing and use             | 0.05                           | 0.05  | 0.00             | 0.04                           | 0.04  | 0.00             |
| Net                                      | 0.72                           | 1.43  | 1.08             | 1.35                           | 1.90  | 1.53             |

Table S21. Tabulated data of the GHG emissions results (tonnes CO<sub>2</sub> e/FU) presented in Figures 2C and 2D of the main manuscript.

| Product                             | Bio-PU               |       |              | Bio-NIPU             |       |              |
|-------------------------------------|----------------------|-------|--------------|----------------------|-------|--------------|
| Case                                | Microalgae<br>system |       | Conventional | Microalgae<br>system |       | Conventional |
|                                     | CA                   | BDO   |              | CA                   | BDO   |              |
| Renewable diesel                    | 7.88                 | 8.07  | 0            | 7.96                 | 8.03  | 0            |
| Conventional diesel                 | 0                    | 0.76  | 8.90         | 0                    | 0.76  | 8.90         |
| Renewable naphtha                   | 3.26                 | 4.66  | 0            | 3.30                 | 4.64  | 0            |
| Conventional gasoline<br>blendstock | 1.04                 | 0     | 4.78         | 1.04                 | 0     | 4.78         |
| Microalgae-based PU                 | 6.25                 | 7.81  | 0            | 9.08                 | 10.81 | 0            |
| Conventional flexible PU            | 0                    | 0     | 12.33        | 0                    | 0     | 0            |
| Conventional rigid PU               | 0                    | 0     | 0            | 0                    | 0     | 14.60        |
| Grid electricity                    | 0.37                 | 0     | 2.73         | 0.37                 | 0     | 1.95         |
| Total                               | 18.80                | 21.30 | 28.73        | 21.75                | 24.25 | 30.22        |

Note: The functional unit (FU) for Bio-PU is defined as the production of 3.6 tonnes of Bio-PU, 97 GJ of renewable diesel, 51 GJ of renewable naphtha and 21 GJ of electricity internally-generated and exported to the grid and the FU

for Bio-NIPU comprises the production of 4.5 tonnes of Bio-NIPU, 97 GJ of renewable diesel, 51 GJ of renewable naphtha and 15 GJ of electricity internally-generated and exported to the grid.

Table S22. Tabulated data of the GHG emissions results (kg CO<sub>2</sub> e/kg) presented in Figure S2 of this SI.

| Product                                  | Bio-PU                      |       |               | Bio-NIPU                    |       |               |
|------------------------------------------|-----------------------------|-------|---------------|-----------------------------|-------|---------------|
| Case                                     | Displacement - System level |       | Process level | Displacement - System level |       | Process level |
|                                          | CA                          | BDO   | Mass          | CA                          | BDO   | Mass          |
| Algae biomass feedstock                  | 2.56                        | 2.38  | 0.63          | 1.99                        | 1.85  | 0.49          |
| Natural gas                              | 1.80                        | 2.96  | 0.79          | 1.46                        | 2.37  | 0.66          |
| Hydrogen                                 | 0.28                        | 0.49  | 0.00          | 0.22                        | 0.39  | 0.00          |
| Ammonia                                  | 0.36                        | 0.36  | 0.09          | 0.29                        | 0.29  | 0.07          |
| Corn steep liquor                        | 0.35                        | 0.05  | 0.00          | 0.27                        | 0.04  | 0.00          |
| Toluene diisocyanate (TDI)               | 0.72                        | 0.72  | 0.72          | -                           | -     | -             |
| Hexane diamine (HDMA)                    | -                           | -     | -             | 1.13                        | 1.13  | 1.13          |
| Surfactant                               | 0.26                        | 0.26  | 0.26          | 0.24                        | 0.24  | 0.24          |
| Other chemicals                          | 0.50                        | 0.47  | 0.41          | 0.61                        | 0.58  | 0.53          |
| Credits due to nutrient recovery         | -0.01                       | -0.01 | 0.00          | -0.01                       | -0.01 | 0.00          |
| Credit from co-product displacement      | -4.12                       | -4.28 | -0.03         | -3.13                       | -3.27 | -0.02         |
| Carbon uptake credits                    | -1.78                       | -1.78 | -1.78         | -1.55                       | -1.55 | -1.55         |
| Credit from carbon sequestration in soil | -0.26                       | -0.25 | -0.01         | -0.21                       | -0.20 | -0.01         |
| Digestate processing and use             | 0.05                        | 0.05  | 0.00          | 0.04                        | 0.04  | 0.00          |
| Net                                      | 0.72                        | 1.43  | 1.08          | 1.35                        | 1.90  | 1.53          |

Table S23. Tabulated data of the fossil energy consumption results (MJ/kg) presented in Figure S3 of this SI.

| Product                             | Bio-PU                      |        |               | Bio-NIPU                    |        |               |
|-------------------------------------|-----------------------------|--------|---------------|-----------------------------|--------|---------------|
| Case                                | Displacement - System level |        | Process level | Displacement - System level |        | Process level |
|                                     | CA                          | BDO    | Mass          | CA                          | BDO    | Mass          |
| Algae biomass feedstock             | 36.82                       | 34.16  | 9.07          | 28.62                       | 26.51  | 7.05          |
| Combined stages                     | 20.39                       | 25.29  | 13.31         | 16.12                       | 20.00  | 10.54         |
| Fuel-only stages                    | 9.66                        | 19.69  | 0.00          | 7.64                        | 15.57  | 0.00          |
| PU-only stages                      | 32.83                       | 37.15  | 20.93         | 50.85                       | 54.27  | 41.44         |
| Credits due to nutrient recovery    | -0.05                       | -0.05  | 0.00          | -0.04                       | -0.04  | 0.00          |
| Credit from co-product displacement | -54.02                      | -56.40 | -0.44         | -40.54                      | -42.43 | -0.29         |
| Digestate processing and use        | 0.67                        | 0.64   | 0.04          | 0.53                        | 0.51   | 0.04          |
| Net                                 | 46.31                       | 60.49  | 42.91         | 63.19                       | 74.40  | 58.78         |

Table S24. Tabulated data of the water consumption results (L/kg) presented in Figure S4 of this SI.

| Product                             | Bio-PU                      |       |               | Bio-NIPU                    |       |               |
|-------------------------------------|-----------------------------|-------|---------------|-----------------------------|-------|---------------|
| Case                                | Displacement - System level |       | Process level | Displacement - System level |       | Process level |
|                                     | CA                          | BDO   | Mass          | CA                          | BDO   | Mass          |
| Algae biomass feedstock             | 8.14                        | 8.20  | 2.01          | 6.39                        | 6.44  | 1.58          |
| Combined stages                     | 14.78                       | 16.68 | 6.27          | 11.69                       | 13.19 | 4.97          |
| Fuel-only stages                    | 26.47                       | 13.86 | 0.00          | 20.93                       | 10.96 | 0.00          |
| PU-only stages                      | 8.05                        | 8.09  | 4.24          | 9.03                        | 9.07  | 6.02          |
| Credits due to nutrient recovery    | -0.02                       | -0.02 | 0.00          | -0.02                       | -0.02 | 0.00          |
| Credit from co-product displacement | -6.49                       | -7.10 | -0.17         | -4.31                       | -4.79 | -0.11         |
| Digestate processing and use        | 0.24                        | 0.23  | 0.01          | 0.19                        | 0.18  | 0.01          |
| Net                                 | 51.16                       | 39.94 | 12.36         | 43.91                       | 35.03 | 12.46         |

Table S25. Tabulated data of the GHG emissions results (kg CO<sub>2</sub> e/kg) presented in Figure S5 of this SI.

| Product                                  | Bio-PU                      |       |               | Bio-NIPU                    |       |               |
|------------------------------------------|-----------------------------|-------|---------------|-----------------------------|-------|---------------|
| Case                                     | Displacement - System level |       | Process level | Displacement - System level |       | Process level |
|                                          | CA                          | BDO   | Mass          | CA                          | BDO   | Mass          |
| Algae biomass feedstock                  | 1.06                        | 0.93  | 0.26          | 0.81                        | 0.71  | 0.20          |
| Combined stages                          | 1.27                        | 1.58  | 0.81          | 1.00                        | 1.25  | 0.64          |
| Fuel-only stages                         | 0.76                        | 1.25  | 0.00          | 0.60                        | 0.99  | 0.00          |
| PU-only stages                           | 2.14                        | 2.41  | 1.40          | 2.42                        | 2.63  | 1.83          |
| Credits due to nutrient recovery         | -0.01                       | -0.01 | 0.00          | -0.01                       | -0.01 | 0.00          |
| Credit from co-product displacement      | -3.40                       | -3.46 | 0.00          | -2.72                       | -2.78 | 0.00          |
| Carbon uptake credits                    | -1.78                       | -1.78 | -1.78         | -1.55                       | -1.55 | -1.55         |
| Credit from carbon sequestration in soil | -0.26                       | -0.25 | -0.01         | -0.21                       | -0.20 | -0.01         |
| Digestate processing and use             | 0.01                        | 0.01  | 0.00          | 0.01                        | 0.00  | 0.00          |
| Net                                      | -0.20                       | 0.67  | 0.69          | 0.35                        | 1.03  | 1.11          |

Table S26. Tabulated data of the GHG emissions variations of Bio-PU in the sensitivity analysis presented in Figure S8A, Figure S8C, and Figure S8E.

|                      | System level<br>CA route |       | System level<br>BDO route |       | Process level |      |
|----------------------|--------------------------|-------|---------------------------|-------|---------------|------|
| Input variation      | −50%                     | +50%  | −50%                      | +50%  | −50%          | +50% |
| Algae biomass        | −263%                    | +253% | −131%                     | +127% | −42%          | +42% |
| Natural gas          | −125%                    | +125% | −103%                     | +103% | −37%          | +37% |
| Toluene diisocyanate | −50%                     | +50%  | −25%                      | +25%  | −34%          | +34% |
| Ammonia              | −25%                     | +25%  | −13%                      | +13%  | −4%           | +4%  |
| Surfactant           | −18%                     | +18%  | −9%                       | +9%   | −12%          | +12% |
| Formic acid          | −14%                     | +14%  | −7%                       | +7%   | −9%           | +9%  |
| Hydrogen peroxide    | −11%                     | +11%  | −6%                       | +6%   | −8%           | +8%  |

Table S27. Tabulated data of the GHG emissions variations of Bio-NIPU in the sensitivity analysis presented in Figure S9A, Figure S9C, and Figure S9E.

|                   | System level<br>CA route |       | System level<br>BDO route |      | Process level |      |
|-------------------|--------------------------|-------|---------------------------|------|---------------|------|
| Input variation   | −50%                     | +50%  | −50%                      | +50% | −50%          | +50% |
| Algae biomass     | −111%                    | +107% | −78%                      | +76% | −23%          | +23% |
| Natural gas       | −54%                     | +54%  | −62%                      | +62% | −22%          | +22% |
| Hexane diamine    | −42%                     | +42%  | −30%                      | +30% | −37%          | +37% |
| Ammonia           | −11%                     | +11%  | −8%                       | +8%  | −2%           | +2%  |
| Surfactant        | −9%                      | +9%   | −6%                       | +6%  | −8%           | +8%  |
| Hydrogen peroxide | −7%                      | +7%   | −5%                       | +5%  | −6%           | +6%  |

Table S28. 90<sup>th</sup> and 10<sup>th</sup> percentiles from the uncertainty analysis of microalgae-based foams (kg CO<sub>2</sub>e/kg).

|                        | Bio-PU                      |                             | Bio-NIPU                    |                             |
|------------------------|-----------------------------|-----------------------------|-----------------------------|-----------------------------|
| Case                   | 10 <sup>th</sup> percentile | 90 <sup>th</sup> percentile | 10 <sup>th</sup> percentile | 90 <sup>th</sup> percentile |
| System level CA route  | −0.28                       | 1.70                        | 0.50                        | 2.18                        |
| System level BDO route | 0.41                        | 2.45                        | 1.07                        | 2.76                        |
| Process level          | 0.82                        | 1.32                        | 1.17                        | 1.90                        |

## References

- 1 Argonne National Laboratory, Greenhouse gases, Regulated Emissions, and Energy use in Technologies Model (GREET)® (2022 Excel) DOI: 10.11578/GREET-Excel-2022/dc.20220908.1 2022.
- 2 H. Cai, L. Ou, M. Wang, R. Davis, M. Wiatrowski, A. Bartling, B. Klein, D. Hartley, P. Burli, Y. Lin, M. Roni, D. N. Thompson, L. Snowden-Swan, Y. Zhu, S. Li, Y. Xu and P. Valdez, *Supply Chain Sustainability Analysis of Renewable Hydrocarbon Fuels via Hydrothermal Liquefaction, Combined Algal Processing, and Biochemical Conversion: Update of the 2022 State-of-Technology Cases*, Argonne National Laboratory, Lemont, IL, United States, 2023.
- 3 B. Klein and R. Davis, *Algal Biomass Production via Open Pond Algae Farm Cultivation: 2022 State of Technology and Future Research*, National Renewable Energy Laboratory, Golden, CO, United States, 2023.
- 4 M. Wiatrowski and R. Davis, *Algal Biomass Conversion to Fuels via Combined Algae Processing (CAP): 2022 State of Technology and Future Research*, National Renewable Energy Laboratory, Golden, CO, United States, 2023.
- 5 T. Dong, E. Dheressa, M. Wiatrowski, A. P. Pereira, A. Zeller, L. M. L. Laurens and P. T. Pienkos, *ACS Sustainable Chem. Eng.*, 2021, **9**, 12858–12869.
- 6 Franklin Associates, *Cradle-to-gate life cycle analysis of toluene diisocyanate resin precursor*, 2023.
- 7 A. B. Dros, O. Larue, A. Reimond, F. D. Campo and M. Pera-Titus, *Green Chem.*, 2015, **17**, 4760–4772.
- 8 P. García-Gutiérrez, R. M. Cuéllar-Franca, D. Reed, G. Dowson, P. Styring and A. Azapagic, *Green Chem.*, 2019, **21**, 4100–4114.
- 9 A. G. Parvatker and M. J. Eckelman, *ACS Sustainable Chem. Eng.*, 2020, **8**, 8519–8536.
- 10 D. Yoffe, R. Frim, S. D. Ukeles, M. J. Dagani, H. J. Barda, T. J. Benya and D. C. Sanders, *Ullmann's Encyclopedia of Industrial Chemistry*, 2013.
- 11 H. Cai, L. Ou, M. Wang, R. Davis, A. Dutta, K. Harris, M. Wiatrowski, E. Tan, A. Bartling, B. Klein, D. Hartley, Y. Lin, M. Roni, D. N. Thompson, L. Snowden-Swan and Y. Zhu, *Supply Chain Sustainability Analysis of Renewable Hydrocarbon Fuels via Indirect Liquefaction, Ex Situ Catalytic Fast Pyrolysis, Hydrothermal Liquefaction, Combined Algal Processing, and Biochemical Conversion: Update of the 2020 State-of-Technology Cases*, Argonne National Laboratory, Lemont, IL, United States, 2021.
- 12 R. Hasan zadeh, P. Mojaver, S. Khalilarya, T. Azdast, A. Chitsaz and M. Mojaver, *Polymers*, 2022, **14**, 4938.
- 13 U.S. Bureau of labor statistics, Average energy prices for the United States, regions, census divisions, and selected metropolitan areas, <https://data.bls.gov/pdq/SurveyOutputServlet>, (accessed May 16, 2023).
- 14 J. Zhang, Y. Zhu, T. R. Hawkins, B. C. Klein, A. M. Coleman, U. Singh, R. Davis, L. Ou, Y. Xu, S. Kar, M. Wiatrowski, S. Gao and P. Valdez, *Sustainable Energy Fuels*, DOI:10.1039/D4SE01423E.
